# Supplementary material
Source: publisher figshare collection journal article supplement (https://springernature.figshare.com/ndownloader/files/27048662)
Supplement: Supplementary file 1 [file 27048662]

Measurement(s),chest X-ray image • radiologist's dictation audio data • radiologist's eye gaze coordinates data
Technology Type(s),eye tracking device • machine learning • Radiologist • Chest Radiography
Sample Characteristic - Organism,Homo sapiens
